# Supplementary material for: Ionic Runoff as a Way to Determine the Degree of Karst Denudation (Case Study Jasov Plateau, Slovak Karst, Slovakia)
Source: MDPI journal article supplement (doi:10.3390/w13111449), 2021-05-21
Supplement: s1 [file s1]

**Table S1:** Characterization coefficients and saturation index of calcite for monitored springs

| Skalistý potok |              |          |                  |                        |         |        |
|----------------|--------------|----------|------------------|------------------------|---------|--------|
|                | Date         | rMg/rCa  | r(Na+K)/r(Ca+Mg) | rHCO <sub>3</sub> /rCl | rNa/rCl | SI     |
| min            |              |          |                  |                        |         |        |
|                | 2014         | 0.012526 | 0.00290          | 1.609                  | 0.223   | -0.130 |
|                | 2015         | 0.015142 | 0.00002          | 1.669                  | 0.307   | -1.140 |
|                | 2016         | 0.012710 | 0.00344          | 1.957                  | 0.188   | 0.630  |
| max            |              |          |                  |                        |         |        |
|                | 2014         | 0.132319 | 0.08235          | 3.013                  | 3.077   | 0.610  |
|                | 2015         | 0.021479 | 0.04588          | 3.067                  | 2.246   | 1.360  |
|                | 2016         | 0.018913 | 0.05800          | 2.929                  | 5.217   | 1.120  |
| average        |              |          |                  |                        |         |        |
|                | 2014         | 0.031175 | 0.01685          | 2.632                  | 0.828   | 0.319  |
|                | 2015         | 0.018162 | 0.01395          | 2.478                  | 0.628   | 0.514  |
|                | 2016         | 0.016184 | 0.01782          | 2.540                  | 1.483   | 0.818  |
|                | whole period | 0.022005 | 0.01597          | 2.548                  | 0.920   | 0.525  |
| Pekná dievčina |              |          |                  |                        |         |        |
|                | Date         | rMg/rCa  | r(Na+K)/r(Ca+Mg) | rHCO <sub>3</sub> /rCl | rNa/rCl | SI     |
| min            |              |          |                  |                        |         |        |
|                | 2014         | 0.055324 | 0.007404         | 0.390                  | 0.159   | 0.060  |
|                | 2015         | 0.138786 | 0.015481         | 0.462                  | 0.320   | 0.300  |
|                | 2016         | 0.153585 | 0.006359         | 0.670                  | 0.173   | 3.150  |
| max            |              |          |                  |                        |         |        |
|                | 2014         | 0.172882 | 0.023812         | 0.729                  | 0.441   | 1.030  |
|                | 2015         | 0.170337 | 0.020562         | 0.764                  | 0.434   | 1.200  |
|                | 2016         | 0.167576 | 0.015007         | 1.026                  | 0.397   | 3.210  |
| average        |              |          |                  |                        |         |        |
|                | 2014         | 0.132029 | 0.015851         | 0.559                  | 0.326   | 0.479  |
|                | 2015         | 0.152240 | 0.018205         | 0.590                  | 0.371   | 0.897  |
|                | 2016         | 0.160084 | 0.012122         | 0.809                  | 0.300   | 3.177  |
|                | whole period | 0.144969 | 0.016162         | 0.613                  | 0.341   | 1.091  |
| Teplica        |              |          |                  |                        |         |        |
|                | Date         | rMg/rCa  | r(Na+K)/r(Ca+Mg) | rHCO <sub>3</sub> /rCl | rNa/rCl | SI     |
| min            |              |          |                  |                        |         |        |
|                | 2014         | 0.062994 | 0.0029           | 3.274                  | 0.340   | 0.310  |
|                | 2015         | 0.083834 | 0.0041           | 0.901                  | 0.308   | 0.490  |
|                | 2016         | 0.089552 | 0.0030           | 3.881                  | 0.263   | 0.760  |
| max            |              |          |                  |                        |         |        |
|                | 2014         | 0.190519 | 0.0349           | 4.748                  | 4.491   | 0.780  |
|                | 2015         | 0.134752 | 0.0531           | 4.750                  | 0.938   | 1.380  |
|                | 2016         | 0.108364 | 0.0634           | 4.600                  | 8.909   | 1.260  |
| average        |              |          |                  |                        |         |        |
|                | 2014         | 0.100877 | 0.0107           | 4.067                  | 1.247   | 0.621  |
|                | 2015         | 0.102325 | 0.0120           | 2.977                  | 0.504   | 1.008  |
|                | 2016         | 0.098549 | 0.0227           | 4.272                  | 3.179   | 1.033  |
|                | whole period | 0.100899 | 0.0143           | 3.694                  | 1.504   | 0.897  |

| Drienovec cave |              |          |                  |                        |         |        |
|----------------|--------------|----------|------------------|------------------------|---------|--------|
|                | Date         | rMg/rCa  | r(Na+K)/r(Ca+Mg) | rHCO <sub>3</sub> /rCl | rNa/rCl | SI     |
| min            |              |          |                  |                        |         |        |
|                | 2014         | 0.009287 | 0.003            | 2.533                  | 0.223   | 0.430  |
|                | 2015         | 0.079767 | 0.004            | 2.363                  | 0.029   | 0.740  |
|                | 2016         | 0.075582 | 0.003            | 3.177                  | 0.210   | 0.260  |
| max            |              |          |                  |                        |         |        |
|                | 2014         | 0.249031 | 0.329            | 4.761                  | 0.943   | 0.980  |
|                | 2015         | 0.144956 | 0.044            | 4.198                  | 2.406   | 1.680  |
|                | 2016         | 0.100196 | 0.035            | 3.889                  | 2.184   | 1.280  |
| average        |              |          |                  |                        |         |        |
|                | 2014         | 0.093583 | 0.047            | 3.926                  | 0.567   | 0.779  |
|                | 2015         | 0.102409 | 0.010            | 3.590                  | 0.599   | 1.037  |
|                | 2016         | 0.087694 | 0.008            | 3.558                  | 0.587   | 0.884  |
|                | whole period | 0.094889 | 0.020            | 3.673                  | 0.586   | 0.905  |
| Sv Jan         |              |          |                  |                        |         |        |
|                | Date         | rMg/rCa  | r(Na+K)/r(Ca+Mg) | rHCO <sub>3</sub> /rCl | rNa/rCl | SI     |
| min            |              |          |                  |                        |         |        |
|                | 2014         | 0.05622  | 0.00526          | 0.926                  | 0.297   | -1.480 |
|                | 2015         | 0.06326  | 0.00004          | 1.112                  | 0.326   | 0.450  |
|                | 2016         | 0.06339  | 0.00705          | 1.362                  | 0.281   | -0.070 |
| max            |              |          |                  |                        |         |        |
|                | 2014         | 0.10255  | 0.06474          | 2.142                  | 1.549   | 0.990  |
|                | 2015         | 0.08898  | 0.01723          | 1.988                  | 0.508   | 1.150  |
|                | 2016         | 0.08983  | 0.06933          | 1.983                  | 5.241   | 1.110  |
| average        |              |          |                  |                        |         |        |
|                | 2014         | 0.07300  | 0.01691          | 1.577                  | 0.612   | 0.247  |
|                | 2015         | 0.08230  | 0.01092          | 1.376                  | 0.419   | 0.858  |
|                | 2016         | 0.07792  | 0.02080          | 1.645                  | 1.180   | 0.708  |
|                | whole period | 0.07790  | 0.01563          | 1.519                  | 0.681   | 0.591  |
| Kozia Studna   |              |          |                  |                        |         |        |
|                | Date         | rMg/rCa  | r(Na+K)/r(Ca+Mg) | rHCO <sub>3</sub> /rCl | rNa/rCl | SI     |
| min            |              |          |                  |                        |         |        |
|                | 2014         | 0.110394 | 0.004            | 2.105                  | 0.552   | 0.050  |
|                | 2015         | 0.285623 | 0.011            | 2.039                  | 0.603   | 0.130  |
|                | 2016         | 0.291429 | 0.012            | 2.292                  | 0.708   | -0.950 |
| max            |              |          |                  |                        |         |        |
|                | 2014         | 0.333416 | 0.017            | 8.227                  | 1.381   | 2.270  |
|                | 2015         | 0.326815 | 0.033            | 3.707                  | 1.932   | 0.860  |
|                | 2016         | 0.336275 | 0.111            | 4.214                  | 12.893  | 1.110  |
| average        |              |          |                  |                        |         |        |
|                | 2014         | 0.258054 | 0.013            | 3.644                  | 1.023   | 0.653  |
|                | 2015         | 0.297131 | 0.017            | 3.006                  | 1.117   | 0.641  |
|                | 2016         | 0.302452 | 0.047            | 3.007                  | 4.790   | 0.403  |
|                | whole period | 0.284927 | 0.024            | 3.209                  | 2.043   | 0.580  |

Table S2: Statistical evaluation of ionic runoff of the Jasov Plateau Springs based on the method of Pulina (1974)

| Date                  | TDS<br>(mg/L) | Discharge<br>(L/s) | Ionic runoff<br>(g/s) | Ionic runoff<br>(t/year) | Ionic runoff<br>(m <sup>3</sup> /year) |
|-----------------------|---------------|--------------------|-----------------------|--------------------------|----------------------------------------|
| <b>Skalistý potok</b> |               |                    |                       |                          |                                        |
| min                   |               |                    |                       |                          |                                        |
| 2014                  |               |                    | 12.76                 | 401.82                   | 160.73                                 |
| 2015                  | 228           | 40.90              | 7.98                  | 251.32                   | 100.53                                 |
| 2016                  | 273           | 27.00              |                       |                          |                                        |
| max                   |               |                    |                       |                          |                                        |
| 2014                  | 638           | 197.00             | 61.66                 | 1942.32                  | 776.93                                 |
| 2015                  | 662           | 221.00             | 64.75                 | 2039.50                  | 815.80                                 |
| 2016                  |               |                    |                       |                          |                                        |
| average               |               |                    |                       |                          |                                        |
| 2014                  | 565           | 91.60              | 25.17                 | 792.76                   | 317.10                                 |
| 2015                  | 604           | 115.34             | 34.56                 | 1088.77                  | 435.51                                 |
| whole period          | 573           | 103.00             | 29.44                 | 927.31                   | 370.92                                 |
| <b>Pekná dievčina</b> |               |                    |                       |                          |                                        |
| min                   |               |                    |                       |                          |                                        |
| 2014                  | 576           | 0.20               | 0.06                  | 1.88                     | 0.75                                   |
| 2015                  | 580           | 0.05               | 0.02                  | 0.52                     | 0.21                                   |
| 2016                  | 520           | 0.50               | 0.13                  | 4.15                     | 1.66                                   |
| max                   |               |                    |                       |                          |                                        |
| 2014                  | 663           | 7.00               | 2.12                  | 66.81                    | 26.72                                  |
| 2015                  | 663           | 3.00               | 0.90                  | 28.44                    | 11.28                                  |
| 2016                  | 613           | 4.00               | 1.11                  | 34.97                    | 13.99                                  |
| average               |               |                    |                       |                          |                                        |
| 2014                  | 613           | 2.80               | 0.88                  | 27.57                    | 11.03                                  |
| 2015                  | 614           | 1.07               | 0.32                  | 10.16                    | 4.06                                   |
| 2016                  | 557           | 1.58               | 0.44                  | 13.90                    | 5.56                                   |
| whole period          | 597           | 1.80               | 0.55                  | 17.21                    | 6.88                                   |
| <b>Teplica</b>        |               |                    |                       |                          |                                        |
| min                   |               |                    |                       |                          |                                        |
| 2014                  | 484           | 4.50               | 1.29                  | 40.75                    | 16.3                                   |
| 2015                  | 530           | 0.50               | 0.13                  | 4.17                     | 1.67                                   |
| 2016                  | 483           | 1.90               | 0.47                  | 14.84                    | 5.94                                   |
| max                   |               |                    |                       |                          |                                        |
| 2014                  | 750           | 192.00             | 46.46                 | 1463.62                  | 585.45                                 |
| 2015                  | 683           | 20.00              | 6.69                  | 210.74                   | 84.29                                  |
| 2016                  | 618           | 1.90               | 0.47                  | 14.84                    | 5.94                                   |
| average               |               |                    |                       |                          |                                        |
| 2014                  | 586           | 39.80              | 10.22                 | 321.96                   | 128.75                                 |
| 2015                  | 596           | 7.75               | 2.46                  | 77.37                    | 30.95                                  |
| 2016                  | 544           | 1.90               | 0.47                  | 14.84                    | 5.94                                   |
| whole period          | 573           | 30.00              | 7.50                  | 236.26                   | 94.50                                  |
| <b>Drienovec cave</b> |               |                    |                       |                          |                                        |
| min                   |               |                    |                       |                          |                                        |
| 2014                  | 556           | 7.80               | 2.34                  | 73.71                    | 29.48                                  |
| 2015                  | 606           | 4.51               | 1.40                  | 44.18                    | 17.67                                  |

|                     |     |        |        |          |        |
|---------------------|-----|--------|--------|----------|--------|
| <b>2016</b>         | 496 | 9.00   | 2.23   | 70.31    | 28.12  |
| max                 |     |        |        |          |        |
| <b>2014</b>         | 699 | 109.00 | 34.17  | 1 076.40 | 430.46 |
| <b>2015</b>         | 714 | 106.00 | 32.28  | 1 016.73 | 406.69 |
| <b>2016</b>         | 644 | 104.00 | 31.72  | 999.18   | 399.67 |
| average             |     |        |        |          |        |
| <b>2014</b>         | 625 | 27.90  | 8.82   | 277.71   | 111.09 |
| <b>2015</b>         | 633 | 25.58  | 8.02   | 252.71   | 101.08 |
| <b>2016</b>         | 581 | 27.10  | 8.15   | 256.82   | 102.73 |
| <b>whole period</b> | 612 | 26.90  | 8.34   | 262.69   | 105.08 |
| <b>Sv Jan</b>       |     |        |        |          |        |
| min                 |     |        |        |          |        |
| <b>2014</b>         | 586 | 10.00  | 3.35   | 105.53   | 42.21  |
| <b>2015</b>         | 602 | 1.70   | 0.56   | 17.75    | 7.10   |
| <b>2016</b>         | 537 | 4.00   | 1.13   | 35.60    | 14.24  |
| max                 |     |        |        |          |        |
| <b>2014</b>         | 693 | 52.00  | 18.02  | 567.57   | 227.03 |
| <b>2015</b>         | 666 | 35.00  | 11.31  | 356.11   | 142.44 |
| <b>2016</b>         | 656 | 13.50  | 4.07   | 128.21   | 51.29  |
| average             |     |        |        |          |        |
| <b>2014</b>         | 636 | 24.00  | 7.67   | 241.72   | 96.69  |
| <b>2015</b>         | 643 | 13.34  | 4.29   | 135.10   | 54.04  |
| <b>2016</b>         | 595 | 6.36   | 1.88   | 59.26    | 23.70  |
| <b>whole period</b> | 623 | 15.30  | 4.85   | 152.77   | 61.11  |
| <b>Kozia Studna</b> |     |        |        |          |        |
| min                 |     |        |        |          |        |
| <b>2014</b>         | 573 | 0,00   | 0.0031 | 0.097    | 0.039  |
| <b>2015</b>         | 569 | 0,00   | 0.0031 | 0.097    | 0.039  |
| <b>2016</b>         | 476 | 0,01   | 0.0030 | 0.095    | 0.038  |
| max                 |     |        |        |          |        |
| <b>2014</b>         | 737 | 1.00   | 0.3245 | 10.222   | 4.089  |
| <b>2015</b>         | 705 | 0.01   | 0.0294 | 0.925    | 0.370  |
| <b>2016</b>         | 647 | 0.50   | 0.1258 | 3.961    | 1.584  |
| average             |     |        |        |          |        |
| <b>2014</b>         | 625 | 0.40   | 0.1299 | 4.092    | 1.637  |
| <b>2015</b>         | 614 | 0.04   | 0.0162 | 0.510    | 0.204  |
| <b>2016</b>         | 557 | 0.15   | 0.0391 | 1.231    | 0.492  |
| <b>whole period</b> | 596 | 0.20   | 0.0667 | 2.100    | 0.840  |
